# Supplementary material
Source: PubMed Central journal article supplement (PMC5553552)
Supplement: NIHMS887951-supplement.pdf [file NIHMS887951-supplement.pdf]

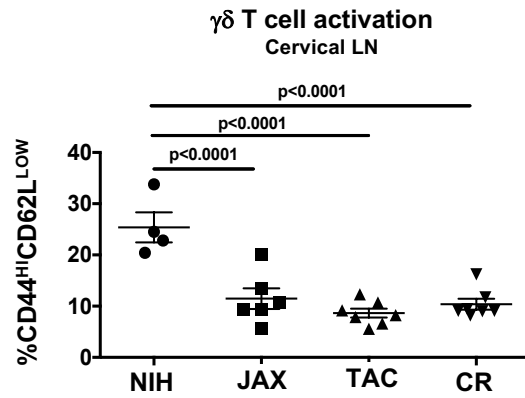

**Figure S1 (refers to Fig 2). Higher frequency of activated  $\gamma\delta$  T cells in the cervical lymph nodes of NIH mice compared to commercial vendors.** Single-cell suspensions of cervical lymph node cells were stained for the  $\gamma\delta$  TCR and activation markers, CD44 and CD62L. Each symbol represents an individual mouse, from 2 combined experiments. Significance was determined by ANOVA.

Corynebacterium mastitidis 16S ribosomal RNA gene, partial sequence

Sequence ID: [gb|AY834747.1](https://genbank.ncbi.nlm.nih.gov/GenBank/seq/aj01/aj010101.gb) Length: 1451 Number of Matches: 1

Range 1: 407 to 1400 [GenBank](#) [Graphics](#) ▼ Next Match ▲ Previous Match

| Score          | Expect                    | Identities                   | Gaps                 | Strand                |
|----------------|---------------------------|------------------------------|----------------------|-----------------------|
| 1797 bits(973) | 0.0                       | 985/994(99%)                 | 0/994(0%)            | Plus/Minus            |
| Query 50       | TGGTTTNCGGGTGTTAGCAACTTTC | TTC                          | TGACGTGACGGGCGGTG    | TGTACAAGGCCCGGAA 109  |
| Sbjct 1400     | TGGTTTTCGGGTGTTACCAACTTTC | CAT                          | GACGTGACGGGCGGTG     | TGTACAAGGCCCGGAA 1341 |
| Query 110      | CGTATTCACCGCAGCGTTGCTGATC | TGCGATTACTAGCGACTCCGACTTC    | CATGGGGTTCGA 169     |                       |
| Sbjct 1340     | CGTATTCACCGCAGCGTTGCTGATC | TGCGATTACTAGCGACTCCGACTTC    | CATGGGGTTCGA 1281    |                       |
| Query 170      | GTTGCAGACCCCAATCCGAAC     | TAAGCCGACTTTACAAGGATTAGCTCC  | ACCTCACGGTA 229      |                       |
| Sbjct 1280     | GTTGCAGACCCCAATCCGAAC     | TAAGCCGACTTTACAAGGATTAGCTCC  | ACCTCACGGTA 1221     |                       |
| Query 230      | TCGCAACCTACTGTACC         | GACCATTGTAGCATGTGTGAAGCCCTGG | ACATAAGGGGCATGA 289  |                       |
| Sbjct 1220     | TCGCAACCTACTGTACC         | GACCATTGTAGCATGTGTGAAGCCCTGG | ACATAAGGGGCATGA 1161 |                       |
| Query 290      | TGATTTGACGTCATCCCACCTTCC  | TCCGAGTTAACCCCGGCAGTCTCTCAT  | GAGTCCCC 349         |                       |
| Sbjct 1160     | TGATTTGACGTCATCCCACCTTCC  | TCCGAGTTAACCCCGGCAGTCTCTCAT  | GAGTCCCC 1101        |                       |
| Query 350      | ACCACCACGTGCTGGCAACATAAG  | ACAAGGTTGCGCTCGTTGCGGGACTTA  | ACCCAACA 409         |                       |
| Sbjct 1100     | ACCACCACGTGCTGGCAACATAAG  | ACAAGGTTGCGCTCGTTGCGGGACTTA  | ACCCAACA 1041        |                       |
| Query 410      | TCTCAGCACGAGCTGACGACAAC   | CATGCACCACCTGTACACCAACCACAA  | AGGGAAAA 469         |                       |
| Sbjct 1040     | TCTCAGCACGAGCTGACGACAAC   | CATGCACCACCTGTACACCAACCACAA  | AGGGAAAA 981         |                       |
| Query 470      | CGCATCTCTGCGCCGATCTGGTGT  | ATGTCAAGCCAGGTAAGGTTCTTCGCG  | TTCATCG 529          |                       |
| Sbjct 980      | CGCATCTCTGCGCCGATCTGGTGT  | ATGTCAAGCCAGGTAAGGTTCTTCGCG  | TTCATCG 921          |                       |
| Query 530      | AATTAATCCACATGCTCCGCGCTT  | TGTGCGGGCCCCGTC AATTCCTTTG   | AGTTT TAGCC 589      |                       |
| Sbjct 920      | AATTAATCCACATGCTCCGCGCTT  | TGTGCGGGCCCCGTC AATTCCTTTG   | AGTTT TAGCC 861      |                       |
| Query 590      | TTGCGGCGTACTCCCAGGCGGGG   | CGCTTAATGCGTTAGCTACGGCACA    | AACCCCGTGG 649       |                       |
| Sbjct 860      | TTGCGGCGTACTCCCAGGCGGGG   | CGCTTAATGCGTTAGCTACGGCACA    | AACCCCGTGG 801       |                       |
| Query 650      | AAGAGGCTCACACCTAGCGCC     | ACCCTTACAGCATGGACTACAGGGT    | ATCTAATCCTG 709      |                       |
| Sbjct 800      | AAGAGGCTCACACCTAGCGCC     | ACCCTTACAGCATGGACTACAGGGT    | ATCTAATCCTG 741      |                       |
| Query 710      | TTGCGTACCCATGCTTTCGCTCCT  | CAGCGTCAGTAACTGCCAGTAACTGC   | CTTCGCCA 769         |                       |
| Sbjct 740      | TTGCGTACCCATGCTTTCGCTCCT  | CAGCGTCAGTAACTGCCAGTAACTGC   | CTTCGCCA 681         |                       |
| Query 770      | TCGGTGTTCCTCCTGATATCTG    | CGCATTCCACCGCTACACCAGGAAT    | TCCAGTTACCCT 829     |                       |
| Sbjct 680      | TCGGTGTTCCTCCTGATATCTG    | CGCATTCCACCGCTACACCAGGAAT    | TCCAGTTACCCT 621     |                       |
| Query 830      | ACAGCACTCAAGTTATGCCCGT    | ATCGCCTGCACGCCGGAGTTAAGCC    | CCGGAATTTAC 889      |                       |
| Sbjct 620      | ACAGCACTCAAGTTATGCCCGT    | ATCGCCTGCACGCCGGAGTTAAGCC    | CCGGAATTTAC 561      |                       |
| Query 890      | AGACGACGCGACAAACCACCT     | TACGAGCTCTTACGCCAGTAAATCC    | GACAAACGCTCGC 949    |                       |
| Sbjct 560      | AGACGACGCGACAAACCACCT     | TACGAGCTCTTACGCCAGTAAATCC    | GACAAACGCTCGC 501    |                       |
| Query 950      | ACCTTACGTATTACCGCGGCTG    | CTGGCAGTAGTTAGCANNNGCTTCT    | NCTCCACCTACC 1009    |                       |
| Sbjct 500      | ACCTTACGTATTACCGCGGCTG    | CTGGCAGTAGTTAGCANNNGCTTCT    | NCTCCACCTACC 441     |                       |
| Query 1010     | GTCACCCCAAAGGGCTTCGTCGG   | TAGCGAAAGGA 1043             |                      |                       |
| Sbjct 440      | GTCACCCCAAAGGGCTTCGTCGG   | TAGCGAAAGGA 407              |                      |                       |

**Figure S2 (refers to Fig 2).** *C. mastitidis* from mouse conjunctiva closely aligns with *C. mastitidis* isolated from human conjunctiva. *C. mastitidis* was isolated and expanded from C57BL/6 conjunctiva. It was then grown to a pure population and Genewiz (LLC) provided the sequence. The sequence is representative of at least 10 isolated colonies from pure populations.

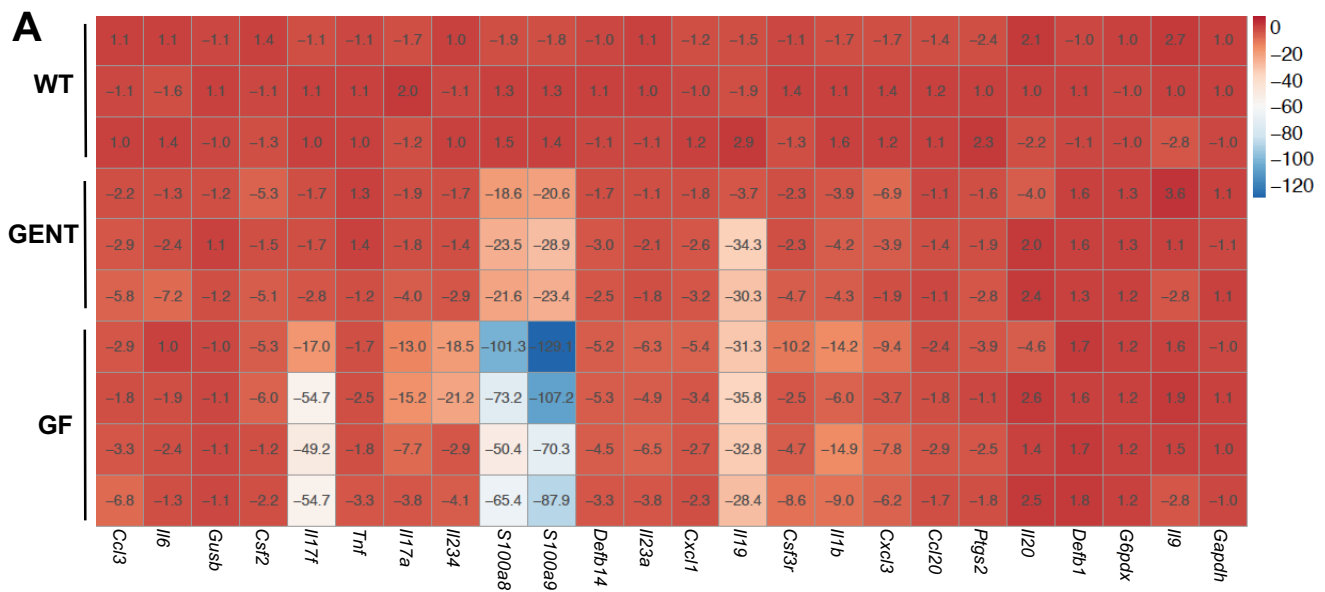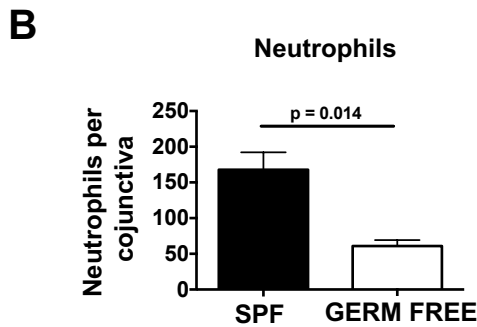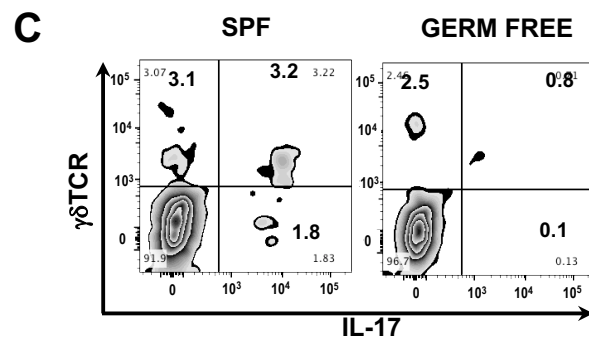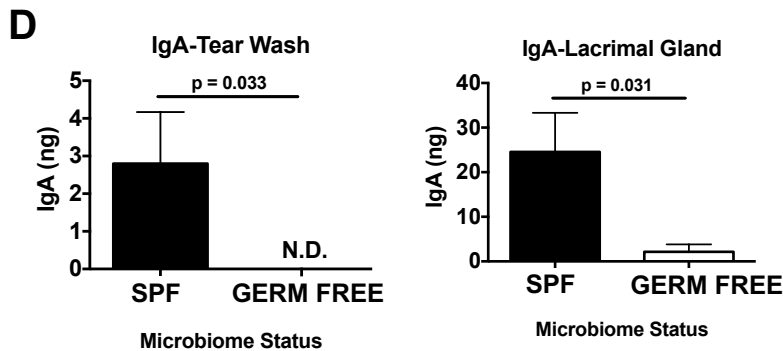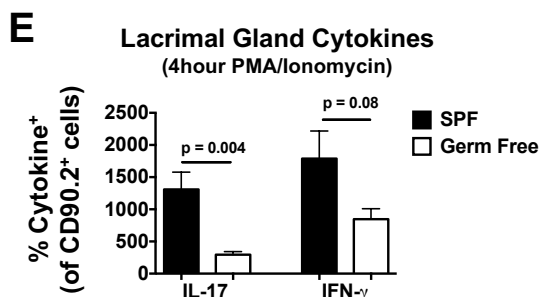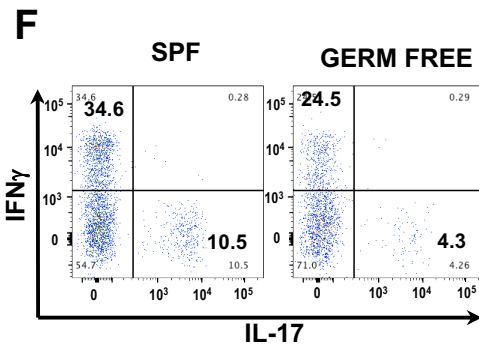

**Figure S3 (refers to Fig 3). Germ free mice have a poorly developed ocular immune response. (A)** Nanostring assessment of genes known to be regulated by IL-17 signaling. Each row represents bulk mRNA from a single mouse from two experiments. **(B-F)** Conjunctival tissue from WT or Germ Free (GF) mice was harvested, treated with collagenase, dispersed into single-cell suspensions and **(B)** assessed for neutrophil numbers directly *ex vivo* or **(C)** stimulated with PMA and ionomycin in the presence of brefeldin A for 4 hours. After stimulation intracellular IL-17A was assessed by flow cytometry. **(D)** Ocular surfaces were washed with 10  $\mu$ l of PBS or lacrimal glands were homogenized in 500  $\mu$ l of PBS and IgA concentration was assessed using ELISA. **(E & F)** Lacrimal gland cells were stimulated with PMA and ionomycin in the presence of brefeldin A for 4 hours and IL-17 and IFN $\gamma$  was assessed using flow cytometry. Bars represent the mean **(D)** concentration of IgA or **(E)** number of cytokine producing cells  $\pm$  SEM from a pool of two experiments (n=6).

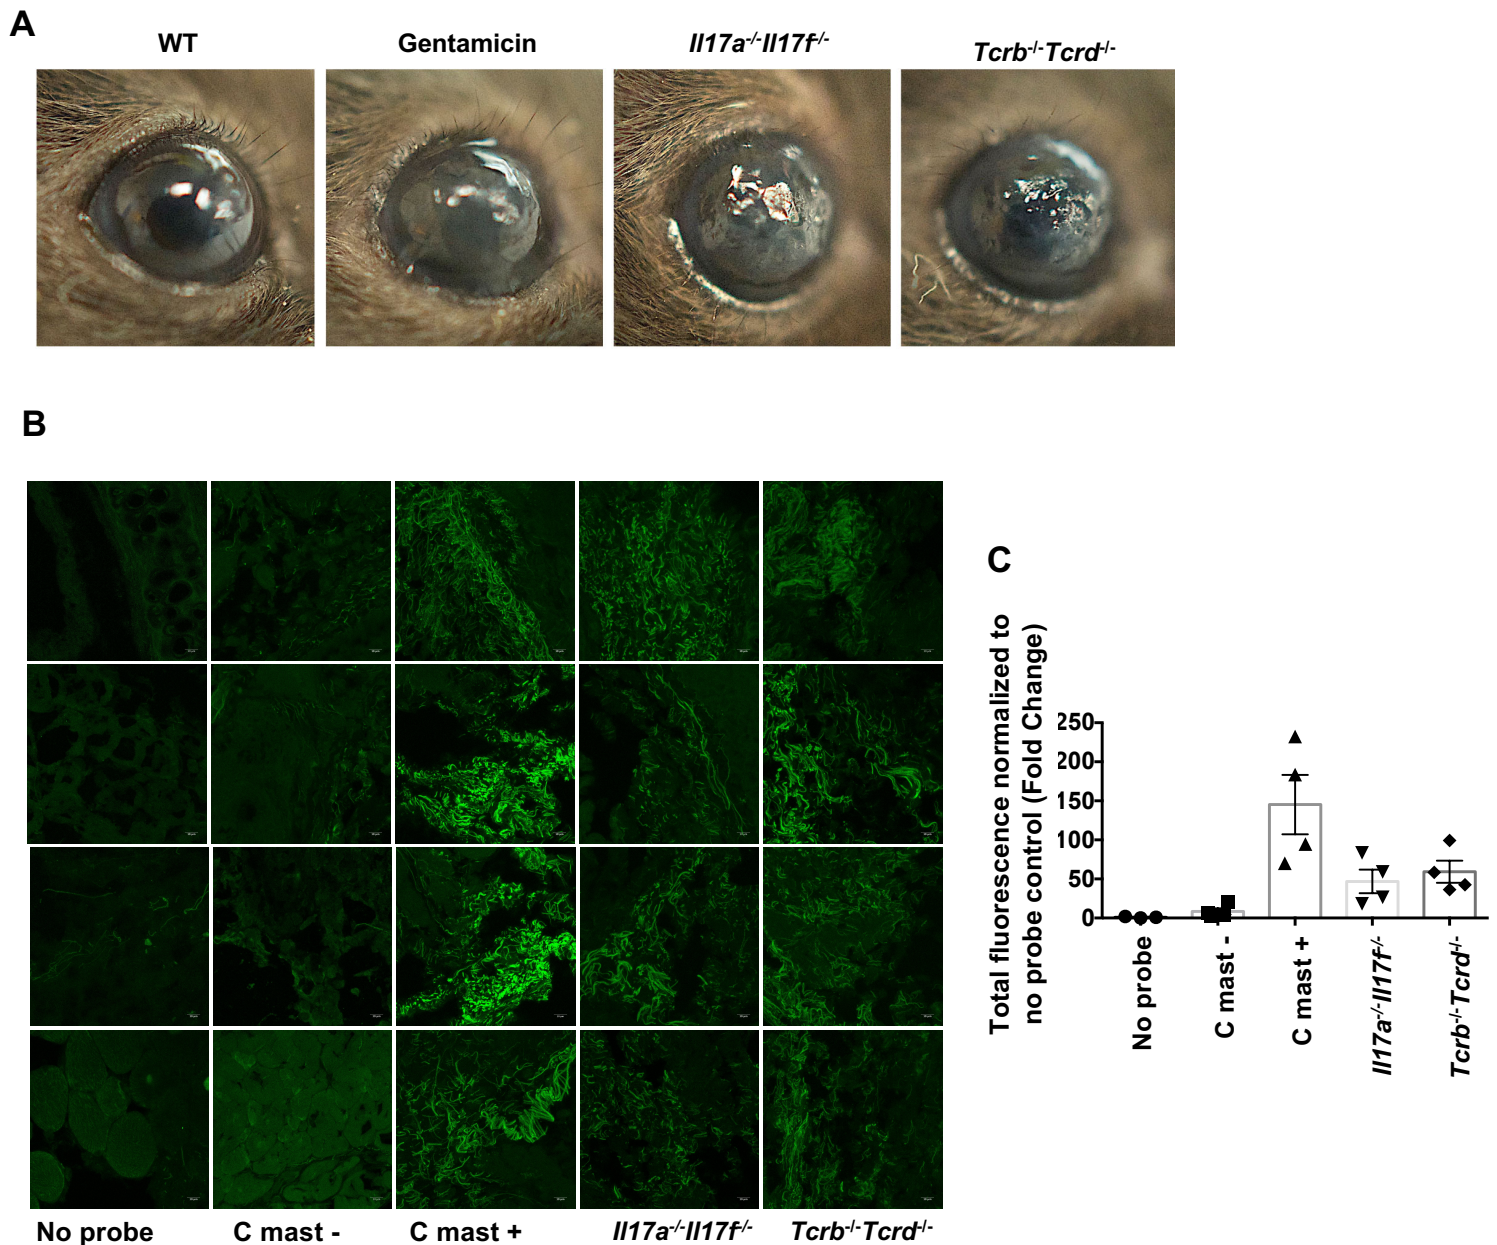

**Figure S4 (refers to Figure 4). Immunodeficient mice are more susceptible to ocular infection with *C. albicans*.** (A) WT mice were topically treated with PBS or gentamicin ophthalmic gel daily for 6 days. After 6 days, WT groups, *Il17a<sup>-/-</sup>Il17f<sup>-/-</sup>*, and *Tcrb<sup>-/-</sup>Tcrd<sup>-/-</sup>* mice were ocularly infected with  $5 \times 10^5$  CFU of *Candida albicans*. Briefly, mice were anesthetized and the ocular surface was gently dabbed with gauze. *C. albicans* (strain SC5314) was then applied in 5 $\mu$ l of PBS and remained on the surface for 30 minutes until mice awoke. Fifteen hours after infection, mice were sacrificed. Images represent ocular pathology at the end point. (B & C) Frozen sections of whole eyes (with eyelids) were stained with fluorescent probes against *Corynebacterium spp.* Data are from 4 individual mice. Background from images in (B) was subtracted and despeckled using FIJI software. Images were converted to binary mode to allow region of interest generation and filament detection in the max image projection. Total fluorescence was then normalized to the 'no probe' control in (C). Each sample represents an individual mouse.

**A**

JAX mice (no *C. mast*)  
 JAX mice + *C. mast*

**CERVICAL LYMPH NODES**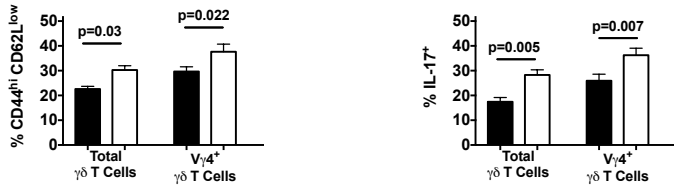**AXILLARY LYMPH NODES**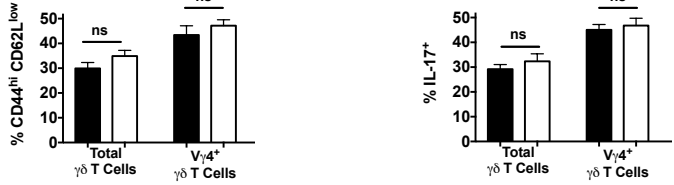**BRACHIAL LYMPH NODES**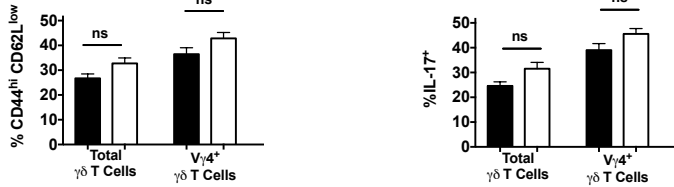**INGUINAL LYMPH NODES**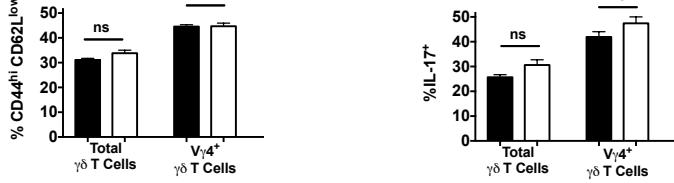**MESENTERIC LYMPH NODES**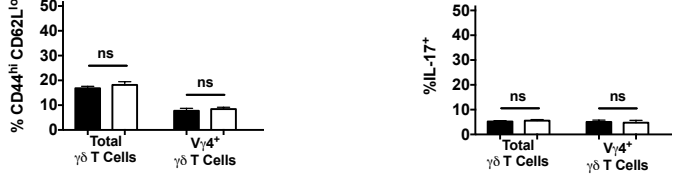**SPLEEN**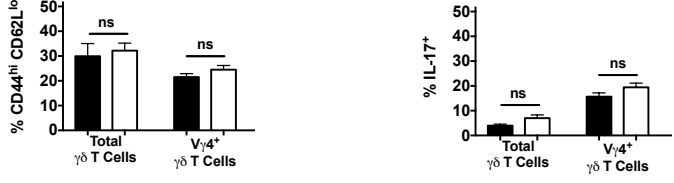**B**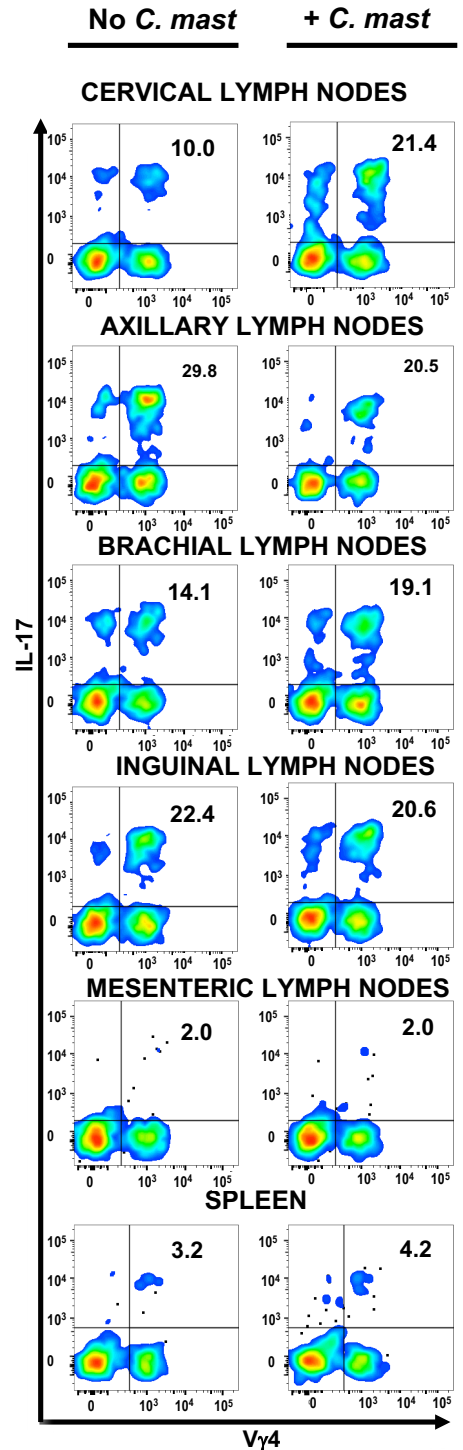

**Figure S5 (refers to Fig 5).** Colonization with *C. mast* induces immunity only in local draining lymph nodes. Mice from JAX Laboratories were given PBS or were inoculated with  $1 \times 10^8$  CFU of *C. mast* once every three days, totaling three inoculations. After 3 weeks, cells from noted lymph nodes or spleen were stained for  $\gamma\delta$  TCR and activation markers (CD44 and CD62L) or were stimulated for 4 hours with PMA and ionomycin in the presence of brefeldin A and were stained for  $\gamma\delta$  TCRs and intracellular IL-17. (A) Bars represent the mean (left) CD44<sup>hi</sup>CD62L<sup>low</sup> % or (right) IL-17% of  $\gamma\delta$  T cells  $\pm$  SEM. (B) Flow plots represent IL-17 production in V $\gamma$ 4<sup>+</sup>  $\gamma\delta$  T cells after stimulation. Data are pooled from two independent experiments ( $n = 6$ , JAX & 8 JAX + *C. mast*). Statistical significance was determined using ANOVA.

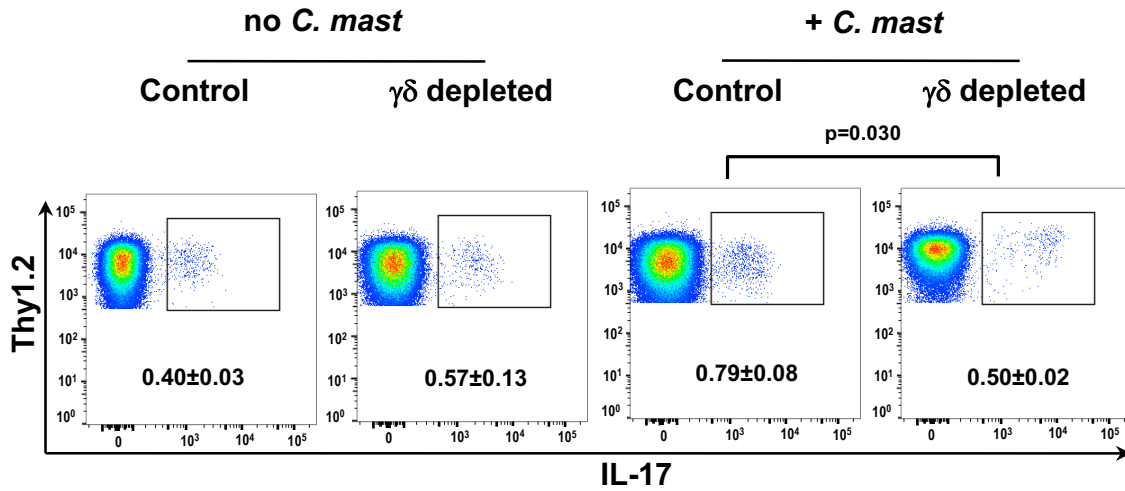

**Figure S6 (refers to Fig 7).  $\gamma\delta$  TCR (UC7-13D5) depletion antibody reduces IL-17 in the draining lymph nodes.** Mice from JAX Laboratories were given PBS or were inoculated with  $1 \times 10^8$  CFU of *C. mast.* once every three days, totaling three inoculations. After 3 weeks, mice were depleted of  $\gamma\delta$  T cells using a 500  $\mu\text{g}$  i.p. injection (UC7-13D5). After 4 days, mice were sacrificed and single-cell suspension of eye-draining lymph node cells were stimulated with PMA and ionomycin in the presence of brefeldin A for 4 hours. After stimulation, cells were stained for intracellular IL-17. The CD90.2<sup>+</sup> population is depicted and flow plots are representative of two experiments (n=3 per group). Numbers represent the mean frequency of IL-17<sup>+</sup> cells  $\pm$  SEM.
